# Supplementary material for: Anterior open bite and temporomandibular disorders: A scoping review
Source: Research Square preprint supplement (doi:10.21203/rs.3.rs-6906775/v1), 2025-08-13
Supplement: Supplementary file 2 [file ba343c46825a3f815aebef6f.docx]

| Supplementary Table 1 - Search strategies. | |
| --- | --- |
| **MEDLINE-OVID****(n= 365)** | ("Anterior open bite*"[All fields] OR "exp open bite"[MeSH Terms] OR "Open bite*"[All Fields] OR "Apertognathia*"[All Fields] OR "Nonocclusion*"[All Fields]) AND ("Temporomandibular disorder*"[All Fields] OR "exp Temporomandibular joint disorders"[MeSH Terms] OR "Temporomandibular joint disorder*"[All Fields] OR "exp Temporomandibular joint"[MESH Terms] OR "Temporomandibular joint*"[All Fields] OR "Temporomandibular joint disc*"[All Fields] OR "Myofascial pain dysfunction syndrome"[All Fields]) OR "TMJ syndrome"[All Fields] OR "Temporomandibular joint syndrome"[All Fields] OR "exp Temporomandibular joint dysfunction syndrome"[MESH Terms] OR "Temporomandibular joint dysfunction syndrome"[All Fields] OR "TMJ disease*"[All Fields] OR "TMJ degenerat*"[All Fields] OR "TMD"[All Fields] OR "TMDS"[All Fields] OR "TMJDS"[All Fields]) |
| **Embase-OVID****(n= 440)** | ("Anterior open bite*"[All fields] OR "exp open bite"[MeSH Terms] OR "Open bite*"[All Fields] OR "Apertognathia*"[All Fields] OR "Nonocclusion*"[All Fields]) AND ("Temporomandibular disorder*"[All Fields] OR "exp Temporomandibular joint disorders"[MeSH Terms] OR "Temporomandibular joint disorder*"[All Fields] OR "exp Temporomandibular joint"[MESH Terms] OR "Temporomandibular joint*"[All Fields] OR "Temporomandibular joint disc*"[All Fields] OR "Myofascial pain dysfunction syndrome"[All Fields]) OR "TMJ syndrome"[All Fields] OR "Temporomandibular joint syndrome"[All Fields] OR "exp Temporomandibular joint dysfunction syndrome"[MESH Terms] OR "Temporomandibular joint dysfunction syndrome"[All Fields] OR "TMJ disease*"[All Fields] OR "TMJ degenerat*"[All Fields] OR "TMD"[All Fields] OR "TMDS"[All Fields] OR "TMJDS"[All Fields]) |
| **Scopus****(n= 453)** | ( (TITLE-ABS-KEY ( "temporomandibular disorder*" ) ) OR ( TITLE-ABS-KEY ( "Temporomandibular Joint Disorder*" ) ) OR ( TITLE-ABS-KEY ( "Temporomandibular Joint*" ) ) OR ( TITLE-ABS-KEY ( "Temporomandibular Joint disc*" ) ) OR ( TITLE-ABS-KEY ( "Myofascial pain dysfunction syndrome" ) ) OR ( TITLE-ABS-KEY ( "TMJ Syndrome" ) ) OR ( TITLE-ABS-KEY ( "Temporomandibular Joint Dysfunction Syndrome" ) ) OR ( TITLE-ABS-KEY ( "Temporomandibular joint syndrome" ) ) OR ( TITLE-ABS-KEY ( "TMJ disease*" ) ) OR ( TITLE-ABS-KEY ( "TMJ degenerat*" ) ) OR ( TITLE-ABS-KEY ( tmd ) ) OR ( TITLE-ABS-KEY ( tmds ) ) OR ( TITLE-ABS-KEY ( tmjds ) ) ) AND ( ( TITLE-ABS-KEY ( aob ) ) OR ( TITLE-ABS-KEY ( nonocclusion* ) ) OR ( TITLE-ABS-KEY ( "open bite*" ) ) OR ( TITLE-ABS-KEY ( apertognathia* ) ) OR ( TITLE-ABS-KEY ( "anterior open bite*" ) ) ) |
| **Web of Science****(n= 493)** | ALL=("Anterior open bite*" OR "Open bite*" OR " Apertognathia*" OR "Nonocclusion*" OR "AOB") AND ALL=("Temporomandibular disorder*" OR "Temporomandibular joint disorder*" OR "Temporomandibular joint*" OR "Temporomandibular joint disc*" OR "Myofascial pain dysfunction syndrome" OR "TMJ syndrome" OR "Temporomandibular joint syndrome" OR "Temporomandibular joint dysfunction syndrome" OR "TMJ disease*" OR "TMJ degenerat*" OR "TMD" OR "TMDS" OR “TMJDS”) |
