# Supplementary material for: Anterior open bite and temporomandibular disorders: A scoping review
Source: Research Square preprint supplement (doi:10.21203/rs.3.rs-6906775/v1), 2025-08-13
Supplement: Supplementary file 3 [file ee1fe597e6df6b6fe501abae.docx]

| Supplementary Table 2 - The characteristics of all studies selected in this scoping review. | | | | |
| --- | --- | --- | --- | --- |
| **Author and year** | **Type of report / study** | **Dentition type** | **TMD diagnosis** | **Relationship of AOB and TMD** |
| Sannan et al. 2018 | Evidence Synthesis | Unclear | Myogenous; Degenerative joint disease; Arthralgia | TMD secondary to AOB; AOB secondary to TMD |
| Pullinger et al. 1993 | Cohort study | Unclear | Myogenous; Disc displacements; Degenerative joint disease | AOB secondary to TMD |
| Peltomäki et al. 2015 | Evidence Synthesis | Unclear | Degenerative joint disease | AOB secondary to TMD |
| Neto et al. 2011 | Case report | Adult | Disc displacements; Degenerative joint disease; Arthralgia | AOB secondary to TMD |
| Moon et al. 2020 | Case report | Adult | Disc displacements; Degenerative joint disease; Arthralgia | AOB secondary to TMD |
| Karhulahti et al. 1990 | Cohort study | Unclear | Disc displacements; Degenerative joint disease; Arthralgia | Not defined |
| Broberg et al. 2017 | Cohort study | Adult | Myogenous; Disc displacements; Arthralgia | Not defined |
| Bertoli et al. 2018 | Cohort study | Adult; Mixed | Myogenous; Disc displacements; Degenerative joint disease; Arthralgia | Not defined |
| Umebayashi et al. 2018 | Case report | Adult | Disc displacements | AOB secondary to TMD |
| Tanaka et al. 2012 | Case report | Adult | Degenerative joint disease; Arthralgia | AOB secondary to TMD |
| Mohlin et al. 1984 | Case report; Evidence Synthesis | Adult | Myogenous; Disc displacements; Arthralgia | Not defined |
| Mohlin et al. 1980 | Cohort study | Adult | Myogenous; Disc displacements; Arthralgia | Not defined |
| Lee et al. 2022 | Case report | Adult | Disc displacements; Degenerative joint disease; Arthralgia | Not defined |
| Koul et al. 2012 | Evidence Synthesis | Adult; Mixed | Myogenous; Disc displacements; Degenerative joint disease; Arthralgia | Not defined |
| Iwasa et al. 2017 | Case report | Adult | Disc displacements; Arthralgia | Not defined |
| Hsu et al. 2024 | Case report | Adult | Disc displacements; Degenerative joint disease | Not defined |
| Griffin et al. 1981 | Case report | Adult | Myogenous; Degenerative joint disease; Arthralgia | Not defined |
| Fujita et al. 2021 | Case series | Adult | Degenerative joint disease | AOB secondary to TMD |
| Costa et al. 2012 | Cohort study | Unclear | Myogenous; Disc displacements; Arthralgia | Not defined |
| Cacioppi et al. 1968 | Case report | Adult | Degenerative joint disease | AOB secondary to TMD |
| Bhatt et al. 2014 | Case report | Unclear | Degenerative joint disease | AOB secondary to TMD |
| Arai et al. 2015 | Case report | Adult | Disc displacements; Degenerative joint disease; Arthralgia | AOB secondary to TMD |
| Wolford et al. 2002 | Case report | Adult | Myogenous; Disc displacements; Arthralgia | Not defined |
| Tegelberg et al. 1987 | Cohort study | Adult | Myogenous; Degenerative joint disease; Arthralgia | AOB secondary to TMD |
| Tegelberg et al. 1987 | Cohort study | Adult | Myogenous; Disc displacements; Degenerative joint disease; Arthralgia | AOB secondary to TMD |
| Lieberman et al. 1985 | Cohort study | Adult; Mixed | Myogenous; Disc displacements; Arthralgia | Not defined |
| Jung et al. 2013 | Case series | Adult | Disc displacements; Arthralgia | Not defined |
| Egermark-Eriksson et al. 1983 | Cohort study | Adult; Mixed | Myogenous; Disc displacements; Arthralgia | TMD secondary to AOB |
| Egermark-Eriksson et al. 1990 | Cohort study | Adult; Mixed | Myogenous; Disc displacements; Arthralgia | TMD secondary to AOB |
| Bakke et al. 1991 | Cohort study | Adult | Myogenous; Disc displacements; Degenerative joint disease; Arthralgia | Not defined |
| Akerman et al. 1988 | Cohort study | Adult; Mixed | Degenerative joint disease; Arthralgia | AOB secondary to TMD |
| Zhong et al. 2023 | Case report | Adult | Disc displacements; Degenerative joint disease; Arthralgia | AOB secondary to TMD |
| Yang et al. 2024 | Case series | Adult | Degenerative joint disease | Not defined |
| Yamada et al. 2001 | Case report | Adult | Disc displacements; Degenerative joint disease; Arthralgia | AOB secondary to TMD |
| Xiao et al. 2022 | Case report | Adult | Unclear | Not defined |
| Wolford et al. 1999 | Case report; Evidence Synthesis | Adult | Myogenous; Disc displacements; Degenerative joint disease; Arthralgia | AOB secondary to TMD |
| Williamson et al. 1990 | Cohort study | Adult | Unclear | Not defined |
| Wang et al. 2019 | Case report | Adult | Degenerative joint disease | AOB secondary to TMD |
| Vita et al. 2012 | Evidence Synthesis | Unclear | Disc displacements; Degenerative joint disease | Not defined |
| Troulis et al. 2008 | Case series | Adult | Degenerative joint disease | AOB secondary to TMD |
| Thilander et al. 2002 | Cohort study | Adult; Mixed | Myogenous; Disc displacements; Arthralgia | Not defined |
| Tanne et al. 1993 | Cohort study | Adult; Mixed | Myogenous; Disc displacements; Arthralgia | TMD secondary to AOB |
| Tanimoto et al. 2022 | Cohort study | Adult | Disc displacements; Degenerative joint disease; Arthralgia | AOB secondary to TMD |
| Tanaka et al. 2000 | Case report | Adult | Myogenous; Disc displacements; Degenerative joint disease; Arthralgia | Not defined |
| Takaoka et al. 2024 | Case report | Adult | Degenerative joint disease | AOB secondary to TMD |
| Synodinos et al. 2008 | Case report; Evidence Synthesis | Mixed | Degenerative joint disease | Not defined |
| Svensson et al. 2000 | Cohort study | Adult; Mixed | Myogenous; Disc displacements; Degenerative joint disease; Arthralgia | AOB secondary to TMD |
| Stewart et al. 1996 | Case report | Adult | Myogenous; Disc displacements; Degenerative joint disease; Arthralgia | AOB secondary to TMD |
| Sonnesen et al. 1998 | Cohort study | Mixed | Myogenous; Disc displacements; Arthralgia | Not defined |
| Song et al. 2015 | Case report | Adult | Myogenous; Arthralgia | Not defined |
| Seligman et al. 2000 | Case series | Adult | Disc displacements; Degenerative joint disease | Not defined |
| Seligman et al. 1996 | Cohort study | Adult | Myogenous; Disc displacements; Degenerative joint disease | Not defined |
| Seligman et al. 1991 | Evidence Synthesis | Adult; Mixed | Myogenous; Disc displacements; Degenerative joint disease | AOB secondary to TMD |
| Seligman et al. 1989 | Cohort study | Adult | Myogenous; Disc displacements; Degenerative joint disease | Not defined |
| Schwartz et al. 2008 | Case report | Adult; Mixed | Degenerative joint disease; Other: Tumour, fracture | Not defined |
| Schmitter et al. 2007 | Cohort study | Adult | Myogenous; Disc displacements; Arthralgia | TMD secondary to AOB |
| Savioli et al. 2004 | Cohort study | Adult; Mixed | Degenerative joint disease; Arthralgia | AOB secondary to TMD |
| Saeed et al. 2001 | Case report | Adult | Degenerative joint disease; Unclear | AOB secondary to TMD |
| Ronchezel et al. 1995 | Cohort study | Adult; Mixed | Degenerative joint disease; Arthralgia | AOB secondary to TMD |
| Riolo et al. 1987 | Cohort study | Adult; Mixed | Myogenous; Disc displacements; Arthralgia | Not defined |
| Rahman et al. 2019 | Case report | Adult | Degenerative joint disease | Not defined |
| Pullinger et al. 1991 | Cohort study | Adult | Myogenous; Disc displacements; Degenerative joint disease | Not defined |
| Poluha et al. 2021 | Cohort study | Adult | Disc displacements; Arthralgia | Not defined |
| Phi et al. 2022 | Case series | Unclear | Degenerative joint disease | Not defined |
| Pahkala et al. 2002 | Cohort study | Adult; Mixed | Myogenous; Disc displacements; Arthralgia | TMD secondary to AOB |
| Ooi et al. 2014 | Cohort study | Adult | Myogenous; Disc displacements; Arthralgia | Not defined |
| Ooi et al. 2020 | Case series | Adult | Myogenous; Disc displacements; Degenerative joint disease; Arthralgia | Not defined |
| Nordahl 1997 | Cohort study | Adult | Degenerative joint disease; Arthralgia | Not defined |
| Motegi et al. 1992 | Cohort study | Adult; Mixed | Disc displacements; Arthralgia | Not defined |
| Miyazaki et al. 1994 | Cohort study | Adult; Mixed | Disc displacements; Arthralgia | TMD secondary to AOB |
| Miyawaki et al. 2005 | Cohort study | Adult; Mixed | Disc displacements; Degenerative joint disease | Not defined |
| MendesMiguel et al. 2007 | Case report | Adult | Disc displacements; Arthralgia | Not defined |
| Mehra et al. 2016 | Case series | Adult | Degenerative joint disease | AOB secondary to TMD |
| McNamara et al. 1995 | Evidence Synthesis | Unclear | Myogenous; Disc displacements; Degenerative joint disease | TMD secondary to AOB |
| Matsuki et al. 2024 | Case report | Adult | Degenerative joint disease | AOB secondary to TMD |
| Matsuda et al. 2022 | Evidence Synthesis | Unclear | Disc displacements; Degenerative joint disease | AOB secondary to TMD |
| Martin et al. 2022 | Case report | Adult | Myogenous; Disc displacements; Degenerative joint disease; Arthralgia | Not defined |
| Marini et al. 1999 | Cohort study | Adult; Mixed | Myogenous; Disc displacements; Arthralgia | Not defined |
| Marangoni et al. 2014 | Cohort study | Mixed | Myogenous; Arthralgia | TMD secondary to AOB |
| Manfredini et al. 2014 | Cohort study | Adult | Myogenous; Disc displacements; Degenerative joint disease; Arthralgia | TMD secondary to AOB |
| Manfredini et al. 2015 | Cohort study | Adult | Myogenous; Disc displacements; Degenerative joint disease; Arthralgia | Not defined |
| Manfredini et al. 2014 | Cohort study | Adult | Disc displacements | Not defined |
| Lynn et al. 1988 | Case report | Adult | Myogenous | Not defined |
| Liu et al. 1997 | Cohort study | Adult; Mixed | Myogenous; Disc displacements; Arthralgia | Not defined |
| Lee et al. 1993 | Case report | Mixed | Disc displacements; Arthralgia | Not defined |
| Kuroda et al. 2007 | Case report | Adult | Myogenous; Disc displacements | Not defined |
| Kuroda et al. 2012 | Case report | Adult | Degenerative joint disease | AOB secondary to TMD |
| Kroese et al. 2021 | Cohort study | Adult | Degenerative joint disease; Arthralgia | AOB secondary to TMD |
| Kroese et al. 2020 | Cohort study | Adult | Degenerative joint disease; Arthralgia | AOB secondary to TMD |
| Kopp et al. 2001 | Evidence Synthesis | Unclear | Degenerative joint disease; Arthralgia | AOB secondary to TMD |
| Kopp et al. 1998 | Evidence Synthesis | Unclear | Degenerative joint disease; Arthralgia | AOB secondary to TMD |
| Kondo et al. 2005 | Case report | Adult | Disc displacements | Not defined |
| Kondo et al. 2000 | Case report | Adult | Disc displacements | Not defined |
| Kondo et al. 2007 | Case report | Adult | Disc displacements; Arthralgia | Not defined |
| Kjellberg et al. 1998 | Evidence Synthesis; Other: Commentary | Unclear | Degenerative joint disease | Not defined |
| Kato et al. 2018 | Case report | Adult | Disc displacements; Degenerative joint disease | AOB secondary to TMD |
| Karakida et al. 2020 | Case report | Adult | Other: Anterior displacement of the condyles (dislocation) | Not defined |
| Kalladka et al. 2022 | Evidence Synthesis; Other: Narrative review | Unclear | Degenerative joint disease | AOB secondary to TMD |
| Kaku et al. 2019 | Case report | Adult | Disc displacements; Degenerative joint disease; Arthralgia | Not defined |
| Jiang et al. 2024 | Case report | Adult | Unclear | Not defined |
| Iwasa et al. 2022 | Cohort study | Unclear | Myogenous; Disc displacements; Degenerative joint disease; Arthralgia | Not defined |
| Huhtanen et al. 2023 | Case series | Adult; Mixed | Myogenous; Degenerative joint disease; Arthralgia | AOB secondary to TMD |
| Huang et al.2023 | Case report | Adult | Disc displacements | TMD secondary to AOB |
| Huang et al. 1997 | Case series | Adult | Degenerative joint disease | Not defined |
| Hu et al. 2009 | Cohort study | Adult; Mixed | Myogenous; Disc displacements; Degenerative joint disease; Arthralgia | AOB secondary to TMD |
| Henrikson et al. 1997 | Cohort study | Adult; Mixed | Myogenous; Disc displacements; Arthralgia | TMD secondary to AOB |
| Helm et al. 1984 | Cohort study | Adult; Mixed | Myogenous; Disc displacements; Arthralgia | Not defined |
| Garza et al. 2024 | Cohort study | Unclear | Disc displacements; Degenerative joint disease | Not defined |
| Fujita et al. 2003 | Cohort study | Adult | Disc displacements; Arthralgia | Not defined |
| Ferguson et al. 1993 | Case report | Adult | Degenerative joint disease; Arthralgia | AOB secondary to TMD |
| Demir et al. 2005 | Cohort study | Adult; Mixed | Myogenous | Not defined |
| deBoever et al. 1987 | Cohort study | Mixed | Disc displacements; Arthralgia | Not defined |
| Cordeiro et al. 2024 | Cohort study | Adult | Myogenous; Disc displacements; Degenerative joint disease; Arthralgia | Not defined |
| Choi et al. 2022 | Case report | Adult | Degenerative joint disease; Arthralgia | AOB secondary to TMD |
| Chen et al. 2005 | Case series | Adult | Disc displacements; Degenerative joint disease; Arthralgia | AOB secondary to TMD |
| Cerqueira et al. 2019 | Case report | Adult | Degenerative joint disease | Not defined |
| Cabanillas-Aquino et al. 2021 | Evidence Synthesis |  | Other: Syndromic | TMD secondary to AOB |
| Byun et al. 2005 | Cohort study | Adult | Myogenous; Disc displacements; Arthralgia | Not defined |
| Bilgic et al. 2017 | Cohort study | Mixed | Myogenous; Disc displacements; Arthralgia | Not defined |
| Bianchi et al. 2017 | Case report | Adult | Myogenous; Disc displacements; Arthralgia | Not defined |
| Barriga et al. 1974 | Cohort study | Adult; Mixed | Degenerative joint disease | Not defined |
| Bales et al. 1994 | Evidence Synthesis | Unclear | Myogenous; Disc displacements; Degenerative joint disease | Not defined |
| Balaji et al. 2022 | Case report | Adult | Disc displacements; Degenerative joint disease; Arthralgia | AOB secondary to TMD |
| Appelgren et al. 1995 | Cohort study | Adult | Degenerative joint disease; Arthralgia | AOB secondary to TMD |
| Aoshima et al. 1994 | Case report | Adult | Disc displacements; Arthralgia | Not defined |
| Alstergren et al. 2006 | Cohort study | Adult | Myogenous; Degenerative joint disease; Arthralgia | AOB secondary to TMD |
| Alstergren et al. 1998 | Cohort study | Adult | Myogenous; Degenerative joint disease; Arthralgia | Not defined |
| Alstergren et al. 2003 | Cohort study | Adult | Degenerative joint disease; Arthralgia | AOB secondary to TMD |
| Alimanovic et al. 2021 | Case series | Unclear | Myogenous; Disc displacements; Degenerative joint disease; Arthralgia | AOB secondary to TMD |
| Ahmed et al. 2013 | Cohort study | Adult | Degenerative joint disease; Arthralgia | AOB secondary to TMD |
| Aghabeigi et al. 2001 | Case series; Other: Questionnaire | Adult | Disc displacements; Degenerative joint disease | TMD secondary to AOB |
| Abramowicz et al. 2016 | Other: narrative review | Mixed | Degenerative joint disease; Arthralgia; Unclear | AOB secondary to TMD; Not defined |
| Abrahamsson et al. 2013 | Other: Doctoral dissertation | Adult | Myogenous; Disc displacements; Degenerative joint disease; Arthralgia | Not defined |
